# Supplementary material for: Functionalized two-dimensional iron boride compounds as novel electrode materials in Li-ion batteries
Source: Royal Society of Chemistry journal article supplement (doi:10.1039/d3cp02468g), 2023-01-01
Supplement: d3cp02468g1.pdf [file d3cp02468g1.pdf]

## Supplementary Information

# Functionalized Two-Dimensional Iron Boride Compounds as a Novel Electrode Material in Li-Ion Batteries

Yu Liu,<sup>a</sup> Haiyan Wang,<sup>a\*</sup> Yiwen Fu,<sup>a</sup> Dan Li,<sup>b</sup> Mengjie Wei,<sup>a</sup> Qinghua Wu,<sup>a</sup> and Qianku Hu<sup>a\*</sup>

<sup>a</sup> *School of Materials Science and Engineering, Henan Polytechnic University, Jiaozuo, 454000, China.*

<sup>b</sup> *Public experimental teaching center, Panzhihua University, Panzhihua, 617000, China*

---

Electronic mail: wanghy@hpu.edu.cn (Wang Hai Yan)

Electronic mail: 212106020037@home.hpu.edu.cn (Liu Yu)

**Table S1** shows the calculated elastic constant  $C_{ij}$  for 2D FeB

| System | $C_{11}$ (N/m) | $C_{12}$ (N/m) | $C_{66}$ (N/m) |
|--------|----------------|----------------|----------------|
| FeB    | 192.775        | 24.778         | 91.866         |

Two-dimensional crystals differ from three-dimensional materials in that there is zero stress outside the two-dimensional plane. As a result, the elastic coefficient matrix of a two-dimensional crystal has reduced dimensionality, which can be expressed using the following formula:

$$c = \begin{bmatrix} c_{11} & c_{12} & c_{16} \\ c_{12} & c_{22} & c_{26} \\ c_{16} & c_{26} & c_{66} \end{bmatrix}$$

Based on the energy-strain relationship, the elastic constants of FeB are calculated as  $C_{11}=192.775$  N/m,  $C_{12}=24.778$  N/m, and  $C_{66}=91.866$  N/m. The stability criteria of  $C_{11} > C_{12}$  and  $C_{66} > 0$  are satisfied, indicating that the two-dimensional FeB is mechanically stable.

**Table S2** The energy of four different adsorption configurations of functional groups ( F, O and S ) on FeB surface.

| Configurations | S1(eV)   | S2(eV)   | S3(eV)   | S4(eV)   |
|----------------|----------|----------|----------|----------|
| FeBF           | -344.445 | -334.312 | -344.939 | -344.785 |
| FeBO           | -368.909 | -356.046 | -377.796 | -374.044 |
| FeBS           | -353.326 | -344.456 | -353.045 | -359.072 |

**Table S3** The bond length and layer thickness parameters of the most stable configuration of functionalized FeBT (T = F, O and S).

| Configurations | $L_{(B-B)}$ (Å) | $L_{(Fe-B)}$ (Å) | Thickness(Å) |
|----------------|-----------------|------------------|--------------|
| FeBF           | 1.682           | 2.174            | 2.748        |
| FeBO           | 1.657           | 2.231            | 2.951        |
| FeBS           | 1.702           | 2.092            | 2.361        |

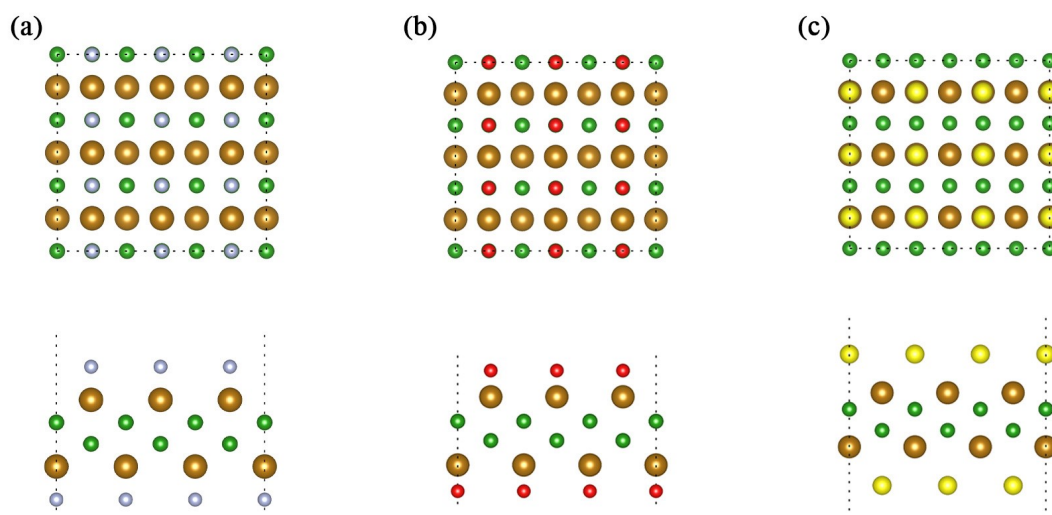**Fig. 2** Top and front views of the most stable configurations for functionalized FeBT (T = F, O, and S) are shown.

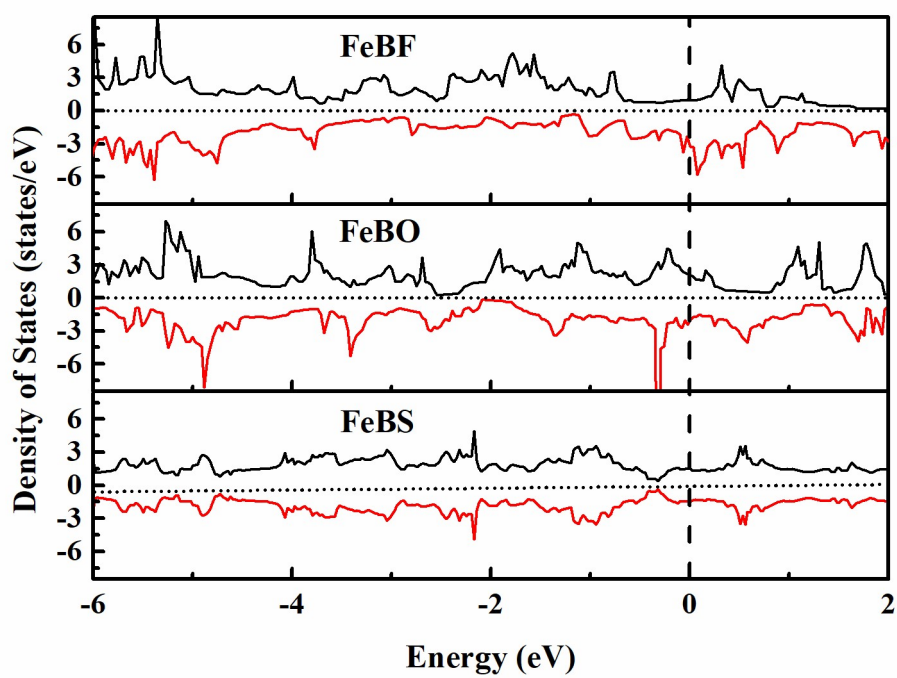

**Fig. 3** DOS for functionalized FeBT (T = O, F, and S) are shown with the Fermi energy set to 0 eV, indicated by the vertical dashed line.

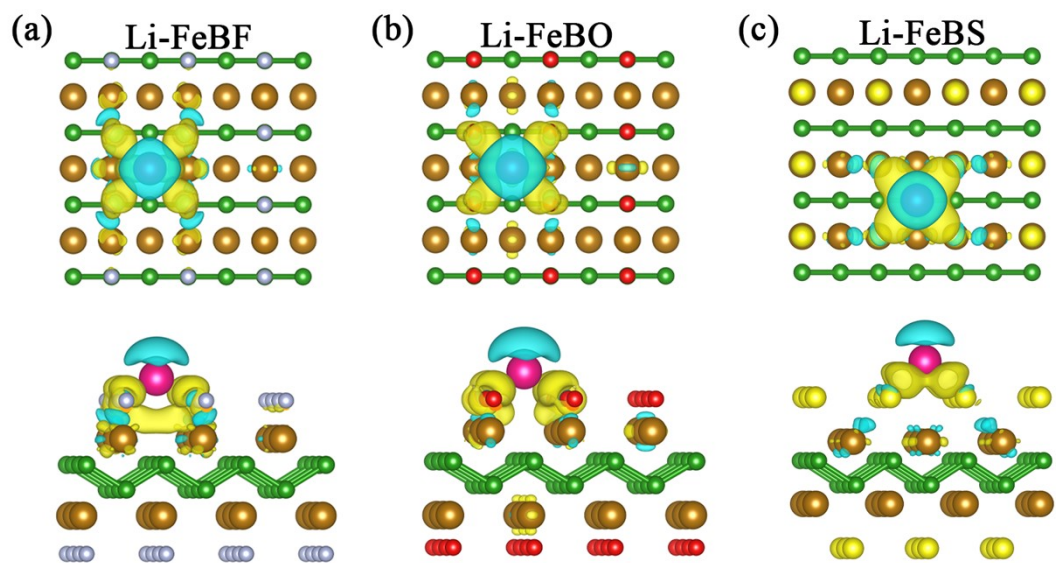

**Fig. 4** The charge density differences of FeBT (T = O, F, and S) were calculated upon the adsorption of a single Li atom. Getting electrons and losing electrons were represented by the pale yellow and blue areas.

**Table S4** The calculated energy for FeB at four adsorption sites of Li atoms after considering zero-point vibrational energy.

| Whether to consider the zero-point<br>energy correction | S1(eV)     | S2(eV)     | S3(eV)     | S4(eV)     |
|---------------------------------------------------------|------------|------------|------------|------------|
| No                                                      | -266.69994 | -267.09992 | -266.83135 | -266.85917 |
| Yes                                                     | -266.67577 | -267.05499 | -266.78682 | -266.82693 |
| Zero-point energy                                       | 0.024174   | 0.044934   | 0.044531   | 0.032242   |

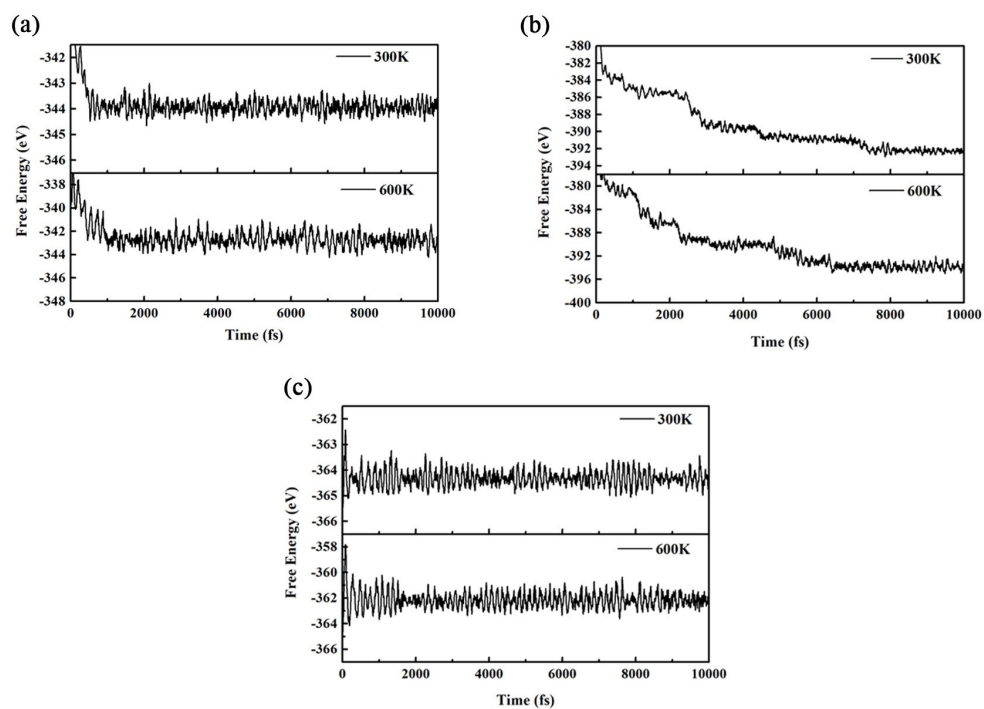

**Fig. 5** The Molecular dynamics simulations of (a) FeBF, (b) FeBO, and (c) FeBS were conducted at 300K and 600K.
